# Supplementary material for: Single-cell profiling identifies LIN28A mRNA targets in the mouse pluripotent-to-2C-like transition and somatic cell reprogramming
Source: PubMed Central journal article supplement (PMC11584578; doi:10.1016/j.jbc.2024.107824), 2024-09-27

**Figure S2 (related to Figure 4)**

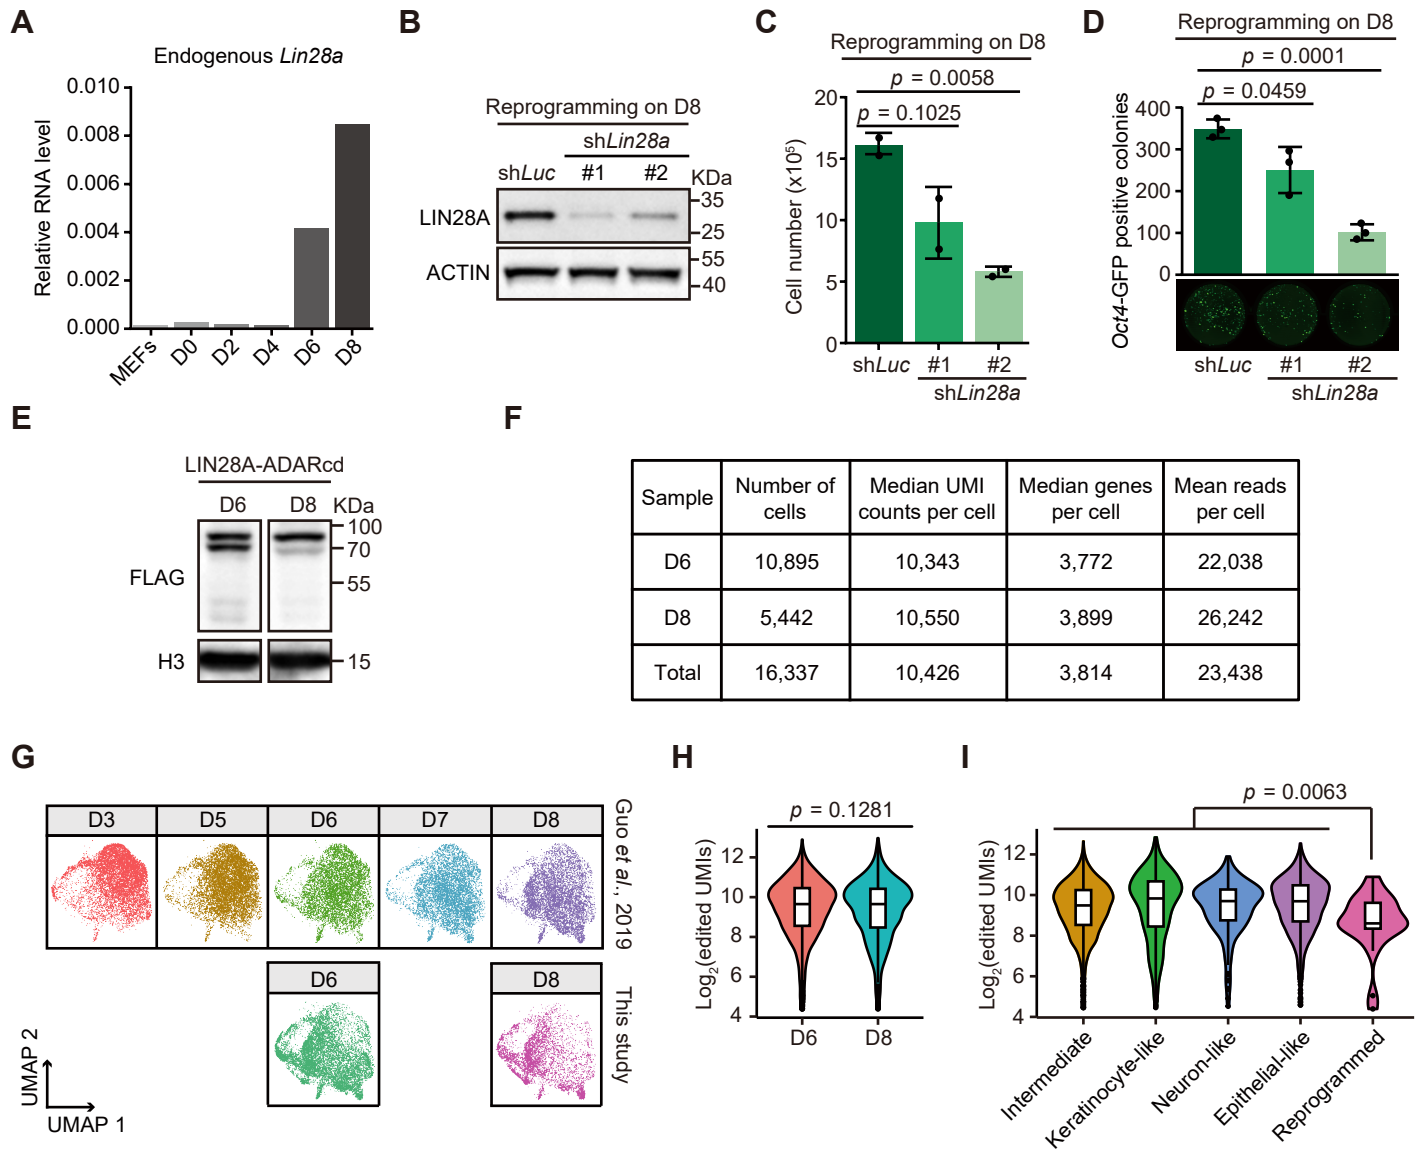

Supplement: mmc7.pdf [file mmc7.pdf]
